# Supplementary material for: Trends of COVID-19 Admissions in an Italian Hub during the Pandemic Peak: Large Retrospective Study Focused on Older Subjects
Source: MDPI journal article supplement (doi:10.3390/jcm10051115), 2021-03-07

## SUPPLEMENTARY TABLE 1

Comparison of the clinical course and treatments against COVID-19 of patients in two different phases of the pandemic peak.

|                                                | First period of<br>pandemic peak<br>(2/28-3/22/2020)<br>(n=713) | Second period<br>of pandemic<br>peak (3/23-<br>6/10/2020)<br>(n=551) | P      | P <sup>a</sup> |
|------------------------------------------------|-----------------------------------------------------------------|----------------------------------------------------------------------|--------|----------------|
| <b><i>Clinical course</i></b>                  |                                                                 |                                                                      |        |                |
| Worst O <sub>2</sub> saturation during stay, % | 91 (85-93)                                                      | 92 (90-95)                                                           | <0.001 | <0.001         |
| Maximum O <sub>2</sub> flows during stay, %    | 50 (28-75)                                                      | 36 (28-75)                                                           | 0.001  | <0.001         |
| Worst arterial O <sub>2</sub> pressure, mmHg   | 57 (46-67)                                                      | 64 (55-74)                                                           | <0.001 | <0.001         |
| Temperature peak during stay, °C               | 38.0 (37.2-38.8)                                                | 37.5 (36.0-38.2)                                                     | <0.001 | <0.001         |
| Non-invasive ventilation during stay           | 85 (12)                                                         | 39 (7)                                                               | 0.003  | 0.042          |
| <b><i>Therapies against COVID-19</i></b>       |                                                                 |                                                                      |        |                |
| Antiviral drugs                                | 371 (52)                                                        | 237 (43)                                                             | 0.002  | 0.033          |
| Antibiotics                                    | 692 (97)                                                        | 490 (89)                                                             | <0.001 | <0.001         |
| Azithromycin                                   | 606 (85)                                                        | 358 (65)                                                             | <0.001 | <0.001         |
| Hydroxychloroquine                             | 385 (54)                                                        | 408 (74)                                                             | <0.001 | <0.001         |
| Steroids                                       | 93 (13)                                                         | 138 (25)                                                             | <0.001 | <0.001         |
| Enoxaparin                                     | 649 (91)                                                        | 496 (90)                                                             | 0.379  | 0.349          |
| Fondaparinux                                   | 36 (5)                                                          | 61 (11)                                                              | <0.001 | <0.001         |

<sup>a</sup>P adjusted for age and sex with linear or binary logistic regression.

Data are shown as median and interquartile range or percentages. Crude comparisons were made with Mann-Whitney test or chi-square test, as appropriate.

## SUPPLEMENTARY TABLE 2

Comparison of the main laboratory tests of patients hospitalized for suspect COVID-19 on admission, categorized by age (>70 years old vs ≤70 years old).

|                                           | AGE<br>≤70<br>N=492 | AGE<br>>70<br>N=772 | P                | P <sup>a</sup>   |
|-------------------------------------------|---------------------|---------------------|------------------|------------------|
| <b>Arterial blood gas analysis</b>        |                     |                     |                  |                  |
| pH                                        | 7.45 (7.43-7.48)    | 7.44 (7.41-7.47)    | <b>&lt;0.001</b> | <b>&lt;0.001</b> |
| HCO <sub>3</sub> <sup>-</sup> , mmol/L    | 26 (23-27)          | 25 (22-27)          | <b>&lt;0.001</b> | <b>&lt;0.001</b> |
| pCO <sub>2</sub> , mmHg                   | 36 (33-40)          | 36 (32-39)          | 0.295            | 0.776            |
| pO <sub>2</sub> , mmHg                    | 75 (65-92)          | 74 (62-93)          | 0.603            | 0.747            |
| pO <sub>2</sub> /FiO <sub>2</sub>         | 284 (185-371)       | 237 (124-319)       | <b>&lt;0.001</b> | <b>&lt;0.001</b> |
| <b>Clinical chemistry and haematology</b> |                     |                     |                  |                  |
| Haemoglobin, g/dl                         | 13.7 (12.5-14.8)    | 13.2 (11.7-14.4)    | <b>&lt;0.001</b> | <b>&lt;0.001</b> |
| White Blood Cells, 1x10 <sup>9</sup> /L   | 6.45 (4.77-8.94)    | 6.96 (5.17-9.52)    | <b>0.020</b>     | <b>0.016</b>     |
| Lymphocytes, 1x10 <sup>9</sup> /L         | 0.97 (0.73-1.36)    | 0.86 (0.57-1.21)    | <b>&lt;0.001</b> | <b>&lt;0.001</b> |
| Platelets, 1x10 <sup>9</sup> /L           | 218 (173-269)       | 203 (159-268)       | <b>0.011</b>     | <b>0.015</b>     |
| Creatinine, mg/dl                         | 0.8 (0.7-1.0)       | 1.0 (0.8-1.4)       | <b>&lt;0.001</b> | <b>&lt;0.001</b> |
| Sodium, mEq/L                             | 137 (135-139)       | 138 (135-141)       | <b>&lt;0.001</b> | <b>&lt;0.001</b> |
| Potassium, mEq/L                          | 4.0 (3.7-4.2)       | 4.0 (3.7-4.4)       | <b>0.005</b>     | <b>&lt;0.001</b> |
| Total bilirubin, mg/dl                    | 0.7 (0.5-0.8)       | 0.7 (0.5-0.9)       | <b>0.015</b>     | <b>0.028</b>     |
| Creatine-phosphokinase, IU/L              | 127 (69-270)        | 136 (70-303)        | 0.492            | 0.060            |
| Lactate-dehydrogenase, IU/L               | 337 (264-450)       | 346 (264-470)       | 0.358            | 0.052            |
| Aspartate aminotransferase, IU/L          | 43 (32-68)          | 44 (30-68)          | 0.674            | 0.051            |
| D-Dimer, ng/ml                            | 742 (495-1303)      | 1188 (761-2292)     | <b>&lt;0.001</b> | <b>&lt;0.001</b> |
| INR ratio                                 | 1.21 (1.14-1.29)    | 1.21 (1.12-1.38)    | 0.055            | <b>&lt;0.001</b> |
| aPTT ratio                                | 0.97 (0.91-1.04)    | 0.97 (0.89-1.07)    | 0.494            | 0.183            |
| Fibrinogen, mg/dl                         | 612 (502-754)       | 596 (477-730)       | <b>0.005</b>     | <b>0.014</b>     |
| C-reactive protein, mg/L                  | 94 (37-153)         | 100 (52-166)        | 0.057            | <b>0.008</b>     |

<sup>a</sup>P adjusted for sex with linear regression.

Data are shown as median and interquartile range. Crude comparisons were made with Mann-Whitney test, as appropriate.

### SUPPLEMENTARY TABLE 3

Comparison of the demographic, anamnestic, clinical features and outcomes of patients hospitalized for suspect COVID-19, categorized by results of the RT-PCR test for SARS-CoV-2 detection on nasopharyngeal swabs performed on admission (negative vs positive).

|                                                    | RT-PCR<br>negative on<br>admission<br>N=422 | RT-PCR<br>positive on<br>admission<br>N=807 | P                | P <sup>a</sup>           |
|----------------------------------------------------|---------------------------------------------|---------------------------------------------|------------------|--------------------------|
| <b>Demography</b>                                  |                                             |                                             |                  |                          |
| Age                                                | 73 (61-83)                                  | 74 (62-82)                                  | 0.842            | -                        |
| Female gender                                      | 193 (46)                                    | 339 (42)                                    | 0.180            | -                        |
| Weight, kg                                         | 75 (65-87)                                  | 78 (65-90)                                  | 0.246            | 0.203                    |
| <b>Comorbidities and functional performance</b>    |                                             |                                             |                  |                          |
| Chronic comorbidities, number                      | 2 (1-4)                                     | 3 (1-4)                                     | 0.190            | 0.287                    |
| CHA <sub>2</sub> DS <sub>2</sub> Vasc score        | 3 (1-4)                                     | 3 (1-4)                                     | 0.175            | <b>0.030<sup>b</sup></b> |
| Hypertension                                       | 240 (57)                                    | 484 (60)                                    | 0.326            | 0.324                    |
| Diabetes                                           | 84 (20)                                     | 169 (21)                                    | 0.896            | 0.962                    |
| Heart disease                                      | 93 (22)                                     | 202 (25)                                    | 0.179            | 0.168                    |
| Obesity                                            | 46 (11)                                     | 97 (12)                                     | 0.653            | 0.632                    |
| Cancer                                             | 76 (18)                                     | 121 (15)                                    | 0.131            | 0.153                    |
| COPD                                               | 38 (9)                                      | 89 (11)                                     | 0.174            | 0.225                    |
| Dementia                                           | 63 (15)                                     | 105 (13)                                    | 0.417            | 0.940                    |
| Systemic drugs, n                                  | 4 (1-6)                                     | 3 (1-6)                                     | 0.850            | 0.935                    |
| Complete autonomy in daily activities              | 258 (62)                                    | 513 (64)                                    | 0.344            | 0.485                    |
| Complete dependency in daily activities            | 79 (19)                                     | 120 (15)                                    | 0.140            | 0.389                    |
| <b>Clinical presentation of suspect COVID-19</b>   |                                             |                                             |                  |                          |
| Symptom duration, days                             | 7 (3-10)                                    | 7 (4-10)                                    | 0.123            | <b>0.005<sup>c</sup></b> |
| Cough                                              | 179 (43)                                    | 385 (48)                                    | 0.061            | 0.060                    |
| Dyspnea                                            | 229 (55)                                    | 410 (51)                                    | 0.172            | 0.155                    |
| Fever                                              | 304 (73)                                    | 707 (88)                                    | <b>&lt;0.001</b> | <b>&lt;0.001</b>         |
| Diarrhoea                                          | 37 (9)                                      | 48 (6)                                      | 0.092            | 0.097                    |
| Other symptoms                                     | 83 (20)                                     | 128 (16)                                    | <b>0.043</b>     | <b>0.046</b>             |
| O <sub>2</sub> saturation in room air on triage, % | 93 (89-96)                                  | 93 (88-95)                                  | <b>0.017</b>     | <b>0.013</b>             |
| Temperature on admission, °C                       | 36.0 (36.0-37.2)                            | 36.9 (36.0-37.7)                            | <b>&lt;0.001</b> | <b>&lt;0.001</b>         |
| O <sub>2</sub> flows administered on admission, %  | 30 (21-44)                                  | 33 (21-70)                                  | <b>0.026</b>     | <b>0.003</b>             |
| CT visual score, %                                 | 30 (20-45)                                  | 30 (20-50)                                  | 0.331            | 0.086                    |
| Consolidations on chest CT                         | 283 (67)                                    | 549 (68)                                    | 0.698            | 0.640                    |
| <b>Outcome</b>                                     |                                             |                                             |                  |                          |
| Intensive care unit                                | 13 (3)                                      | 40 (5)                                      | 0.291            | 0.257                    |
| Death                                              | 58 (14)                                     | 243 (30)                                    | <b>&lt;0.001</b> | <b>&lt;0.001</b>         |

<sup>a</sup>P adjusted for sex and age with linear or binary logistic regression.

<sup>b</sup>CHA<sub>2</sub>DS<sub>2</sub>Vasc Score is higher in patients with positive swab.

<sup>c</sup>Symptom duration is longer in patients with negative swab.

Data are shown as median and interquartile range or numbers and percentages. Crude comparisons were made with Mann-Whitney test or chi-square test, as appropriate. Data on RT-PCR results for SARS-CoV-2 detection were available in 1229 of the 1264 patients included in the study.

## SUPPLEMENTARY TABLE 4

Comparison of the main laboratory tests of patients hospitalized for suspect COVID-19 performed on admission, categorized by results of the RT-PCR test for SARS-CoV-2 detection on nasopharyngeal swabs (positive vs negative).

|                                           | RT-PCR<br>negative on<br>admission<br>N=422 | RT-PCR positive<br>on admission<br>N=807 | P                        | P <sup>a</sup>               |
|-------------------------------------------|---------------------------------------------|------------------------------------------|--------------------------|------------------------------|
| <b>Arterial blood gas analysis</b>        |                                             |                                          |                          |                              |
| pH                                        | 7.44 (7.41-7.47)                            | 7.45 (7.42-7.48)                         | <b>0.027</b>             | 0.065                        |
| HCO <sub>3</sub> <sup>-</sup> , mmol/L    | 25 (23-27)                                  | 25 (23-27)                               | 0.621                    | 0.570                        |
| pCO <sub>2</sub> , mmHg                   | 36 (33-40)                                  | 36 (32-39)                               | <b>0.014</b>             | <b>0.013</b>                 |
| pO <sub>2</sub> , mmHg                    | 81 (67-97)                                  | 73 (61-90)                               | <b>&lt;0.001</b>         | <b>0.004</b>                 |
| pO <sub>2</sub> /FiO <sub>2</sub>         | 270 (206-362)                               | 236 (126-333)                            | <b>&lt;0.001</b>         | <b>&lt;0.001</b>             |
| <b>Clinical chemistry and haematology</b> |                                             |                                          |                          |                              |
| Haemoglobin, g/dl                         | 13.1 (11.8-14.3)                            | 13.6 (12.3-14.8)                         | <b>&lt;0.001</b>         | <b>&lt;0.001</b>             |
| White Blood Cells, 1x10 <sup>9</sup> /L   | 7.41 (5.60-10.12)                           | 6.41 (4.68-8.81)                         | <b>&lt;0.001</b>         | <b>&lt;0.001</b>             |
| Lymphocytes, 1x10 <sup>9</sup> /L         | 1.01 (0.68-1.45)                            | 0.87 (0.61-1.18)                         | <b>&lt;0.001</b>         | <b>&lt;0.001</b>             |
| Platelets, 1x10 <sup>9</sup> /L           | 232 (181-312)                               | 197 (155-246)                            | <b>&lt;0.001</b>         | <b>&lt;0.001</b>             |
| Creatinine, mg/dl                         | 0.9 (0.7-1.1)                               | 0.9 (0.7-1.2)                            | <b>0.033</b>             | 0.968                        |
| Sodium, mEq/L                             | 138 (135-140)                               | 137 (135-140)                            | 0.096                    | 0.142                        |
| Potassium, mEq/L                          | 4.0 (3.7-4.4)                               | 4.0 (3.7-4.3)                            | 0.961                    | 0.859                        |
| Total bilirubin, mg/dl                    | 0.7 (0.5-0.9)                               | 0.7 (0.5-0.9)                            | <b>0.004<sup>b</sup></b> | <b>&lt;0.001<sup>b</sup></b> |
| Creatine-phosphokinase, IU/L              | 122 (63-219)                                | 137 (74-324)                             | <b>0.002</b>             | 0.131                        |
| Lactate-dehydrogenase, IU/L               | 323 (250-433)                               | 350 (269-472)                            | <b>0.001</b>             | 0.891                        |
| Aspartate aminotransferase, IU/L          | 40 (27-63)                                  | 46 (32-69)                               | <b>&lt;0.001</b>         | 0.587                        |
| D-Dimer, ng/ml                            | 1149 (653-2165)                             | 975 (627-1707)                           | <b>0.013</b>             | <b>0.036</b>                 |
| INR ratio                                 | 1.21 (1.13-1.34)                            | 1.21 (1.13-1.32)                         | 0.186                    | 0.362                        |
| aPTT ratio                                | 0.96 (0.89-1.04)                            | 0.98 (0.90-1.07)                         | <b>0.006</b>             | 0.448                        |
| Fibrinogen, mg/dl                         | 596 (480-754)                               | 596 (490-730)                            | 0.839                    | 0.997                        |
| C-reactive protein, mg/L                  | 89 (38-142)                                 | 102 (50-167)                             | <b>0.005</b>             | <b>0.007</b>                 |

<sup>a</sup>P adjusted for sex and age with linear regression.

<sup>b</sup>Bilirubin levels were higher in patients with negative RT-PCR test.

Data are shown as median and interquartile range. Crude comparisons were made with Mann-Whitney test, as appropriate. Data on RT-PCR results for SARS-CoV-2 detection were available in 1229 of the 1264 patients included in the study.

## SUPPLEMENTARY TABLE 5

Comparison of the blood analysis on admission, after categorization of participants according to the presence of multimorbidity ( $\geq 2$  chronic diseases).

|                                           | Patients without<br>multimorbidity (0-1<br>chronic diseases)<br>(n=335) | Patients with<br>multimorbidity ( $\geq 2$<br>chronic diseases)<br>(n=923) | P                | P <sup>a</sup>   | P <sup>b</sup>   | $\beta$ standardized<br>for<br>multimorbidity |
|-------------------------------------------|-------------------------------------------------------------------------|----------------------------------------------------------------------------|------------------|------------------|------------------|-----------------------------------------------|
| pH                                        | 7.45 (7.43-7.48)                                                        | 7.44 (7.41-7.47)                                                           | <b>&lt;0.001</b> | 0.002            | 0.002            | -0.100                                        |
| Bicarbonate, mmol/L                       | 25 (23-27)                                                              | 25 (23-27)                                                                 | 0.182            | 0.662            | 0.682            | -                                             |
| pCO <sub>2</sub> , mmHg                   | 36 (33-39)                                                              | 36 (33-40)                                                                 | 0.343            | 0.266            | 0.299            | -                                             |
| pO <sub>2</sub> , mmHg                    | 76 (64-90)                                                              | 74 (62-93)                                                                 | 0.971            | 0.506            | 0.803            | -                                             |
| PaO <sub>2</sub> /FiO <sub>2</sub> , mmHg | 286 (192-371)                                                           | 243 (134-333)                                                              | <b>&lt;0.001</b> | 0.263            | 0.129            | -                                             |
| Haemoglobin, g/dl                         | 14.0 (13.0-14.9)                                                        | 13.2 (11.7-14.3)                                                           | <b>&lt;0.001</b> | <b>&lt;0.001</b> | <b>&lt;0.001</b> | -0.152                                        |
| White Blood Cell, 1x10 <sup>9</sup> /L    | 6.60 (4.77-8.81)                                                        | 6.78 (5.06-9.52)                                                           | 0.093            | 0.430            | 0.570            | -                                             |
| Lymphocytes, 1x10 <sup>9</sup> /L         | 0.94 (0.70-1.32)                                                        | 0.88 (0.60-1.25)                                                           | <b>0.010</b>     | 0.558            | 0.679            | -                                             |
| Platelets, 1x10 <sup>9</sup> /L           | 214 (177-271)                                                           | 207 (159-266)                                                              | 0.112            | 0.915            | 0.748            | -                                             |
| Creatinine, mg/dl                         | 0.8 (0.7-1.0)                                                           | 0.9 (0.7-1.3)                                                              | <b>&lt;0.001</b> | <b>&lt;0.001</b> | <b>&lt;0.001</b> | 0.111                                         |
| Sodium, mEq/L                             | 137 (135-139)                                                           | 138 (135-140)                                                              | <b>0.008</b>     | 0.769            | 0.690            | -                                             |
| Potassium, mEq/L                          | 4.0 (3.7-4.2)                                                           | 4.0 (3.6-4.4)                                                              | <b>0.012</b>     | <b>0.025</b>     | <b>0.020</b>     | 0.074                                         |
| Total bilirubin, mg/dl                    | 0.7 (0.5-0.9)                                                           | 0.7 (0.5-0.9)                                                              | 0.483            | 0.074            | 0.061            | -                                             |
| Aspartate aminotransferase, IU/L          | 44 (33-69)                                                              | 43 (29-68)                                                                 | 0.200            | 0.417            | 0.325            | -                                             |
| Creatine phosphokinase, IU/L              | 125 (73-265)                                                            | 137 (68-296)                                                               | 0.482            | 0.228            | 0.198            | -                                             |
| Lactate dehydrogenase, IU/L               | 350 (272-475)                                                           | 337 (262-457)                                                              | 0.452            | 0.749            | 0.592            | -                                             |
| D-dimer, ng/dl                            | 801 (544-1498)                                                          | 1096 (666-2008)                                                            | <b>&lt;0.001</b> | 0.159            | 0.144            | -                                             |
| Fibrinogen, ng/dl                         | 612 (519-754)                                                           | 596 (480-730)                                                              | <b>0.028</b>     | 0.114            | 0.154            | -                                             |
| INR ratio                                 | 1.21 (1.13-1.29)                                                        | 1.21 (1.13-1.33)                                                           | 0.147            | 0.090            | 0.109            | -                                             |
| aPTT ratio                                | 0.96 (0.91-1.04)                                                        | 0.97 (0.90-1.07)                                                           | 0.187            | 0.341            | 0.382            | -                                             |
| C-reactive protein, mg/L                  | 91 (44-154)                                                             | 100 (49-163)                                                               | 0.293            | 0.803            | 0.940            | -                                             |

<sup>a</sup>P adjusted for age and sex or <sup>b</sup>age, sex and period of admission with linear regression, as appropriate.

Data are shown as median and interquartile range. Crude comparisons were made with Mann-Whitney test, as appropriate.

Data on multimorbidity were available for 1258 of the 1264 patients included in the study.

## SUPPLEMENTARY TABLE 6

Comparison of the clinical course, treatments administered and outcomes, after categorization of participants according to the presence of multimorbidity ( $\geq 2$  chronic diseases).

|                                                | Patients without<br>multimorbidity (0-1<br>chronic diseases)<br>(n=335) | Patients with<br>multimorbidity ( $\geq 2$<br>chronic diseases)<br>(n=923) | P                | P <sup>a</sup>   | P <sup>b</sup>   | $\beta$ standardized or<br>Odds Ratio (95%<br>Confidence Interval)<br>for multimorbidity |
|------------------------------------------------|-------------------------------------------------------------------------|----------------------------------------------------------------------------|------------------|------------------|------------------|------------------------------------------------------------------------------------------|
| <b><i>Clinical course</i></b>                  |                                                                         |                                                                            |                  |                  |                  |                                                                                          |
| Worst O <sub>2</sub> saturation during stay, % | 92 (90-95)                                                              | 91 (85-93)                                                                 | <b>&lt;0.001</b> | 0.057            | <b>0.015</b>     | -0.075                                                                                   |
| Maximum O <sub>2</sub> flows during stay, %    | 35 (24-75)                                                              | 44 (30-75)                                                                 | <b>&lt;0.001</b> | <b>0.028</b>     | <b>0.011</b>     | 0.079                                                                                    |
| Worst arterial O <sub>2</sub> pressure, mmHg   | 62 (52-70)                                                              | 59 (50-70)                                                                 | <b>0.096</b>     | 0.688            | 0.401            | -                                                                                        |
| Temperature peak during stay, °C               | 38.0 (37.2-38.8)                                                        | 37.7 (36.9-38.5)                                                           | <b>0.183</b>     | 0.056            | 0.142            | -                                                                                        |
| Non-invasive ventilation during stay           | 37 (11)                                                                 | 92 (10)                                                                    | 0.516            | <b>0.037</b>     | <b>0.026</b>     | 1.72 (1.07-2.76)                                                                         |
| <b><i>Therapies against COVID-19</i></b>       |                                                                         |                                                                            |                  |                  |                  |                                                                                          |
| Antiviral drugs                                | 181 (54)                                                                | 424 (46)                                                                   | <b>0.008</b>     | 0.548            | 0.645            | -                                                                                        |
| Antibiotics                                    | 315 (94)                                                                | 868 (94)                                                                   | 0.667            | 0.800            | 0.858            | -                                                                                        |
| Azithromycin                                   | 275 (82)                                                                | 683 (74)                                                                   | <b>0.005</b>     | <b>0.029</b>     | 0.090            | -                                                                                        |
| Hydroxychloroquine                             | 311 (63)                                                                | 581 (63)                                                                   | 0.947            | 0.674            | 0.905            | -                                                                                        |
| Steroid                                        | 33 (10)                                                                 | 203 (22)                                                                   | <b>&lt;0.001</b> | <b>&lt;0.001</b> | <b>&lt;0.001</b> | 2.52 (1.62-3.90)                                                                         |
| Enoxaparin                                     | 308 (92)                                                                | 830 (90)                                                                   | 0.221            | 0.221            | 0.242            | -                                                                                        |
| Fondaparinux                                   | 20 (6)                                                                  | 74 (8)                                                                     | 0.185            | 0.143            | 0.216            | -                                                                                        |
| <b><i>Outcome</i></b>                          |                                                                         |                                                                            |                  |                  |                  |                                                                                          |
| Intensive care unit                            | 23 (7)                                                                  | 27 (3)                                                                     | <b>0.004</b>     | 0.755            | 0.886            | -                                                                                        |
| Death                                          | 40 (12)                                                                 | 277 (30)                                                                   | <b>&lt;0.001</b> | <b>0.036</b>     | <b>0.015</b>     | 1.64 (1.10-2.45)                                                                         |

<sup>a</sup>P adjusted for age and sex or <sup>b</sup>age, sex and period of admission with linear or binary logistic regression, as appropriate.

Data are shown as median and interquartile range or percentages. Crude comparisons were made with Mann-Whitney test or chi-square test, as appropriate.

Data on multimorbidity were available for 1258 of the 1264 patients included in the study.

## SUPPLEMENTARY TABLE 7

Comparison of the demographic, anamnestic and clinical features of patients, categorized according to the class of functional autonomy.

|                                                    | Patients with no autonomy/complete dependency in daily activities (n=210) | Patients with partial autonomy in daily activities (n=257) | Patients with complete autonomy in daily activities (n=784) | P <sup>a</sup> | β standardized or Odds Ratio (95% Confidence Interval) for autonomy |
|----------------------------------------------------|---------------------------------------------------------------------------|------------------------------------------------------------|-------------------------------------------------------------|----------------|---------------------------------------------------------------------|
| <b>Demography</b>                                  |                                                                           |                                                            |                                                             |                |                                                                     |
| Age, years                                         | 86 (81-90)                                                                | 82 (77-87)                                                 | 66 (57-65)                                                  | <0.001         | -                                                                   |
| Female gender                                      | 134 (64)                                                                  | 113 (44)                                                   | 306 (39)                                                    | <0.001         | -                                                                   |
| Weight, kg                                         | 62 (55-71)                                                                | 72 (63-84)                                                 | 80 (70-90)                                                  | 0.063          |                                                                     |
| <b>Anamnestic data</b>                             |                                                                           |                                                            |                                                             |                |                                                                     |
| Chronic diseases, n                                | 4 (3-6)                                                                   | 4 (2-5)                                                    | 2 (1-3)                                                     | <0.001         | -0.248                                                              |
| CHA <sub>2</sub> DS <sub>2</sub> Vasc score        | 4 (3-5)                                                                   | 4 (3-5)                                                    | 2 (1-3)                                                     | <0.001         | -0.116                                                              |
| Systemic drugs, n                                  | 6 (4-8)                                                                   | 6 (3-8)                                                    | 2 (0-5)                                                     | <0.001         | -0.239                                                              |
| Hypertension                                       | 134 (64)                                                                  | 193 (75)                                                   | 408 (52)                                                    | 0.120          | -                                                                   |
| Diabetes                                           | 57 (27)                                                                   | 74 (29)                                                    | 133 (17)                                                    | 0.129          | -                                                                   |
| Obesity                                            | 10 (5)                                                                    | 28 (11)                                                    | 110 (14)                                                    | 0.305          | -                                                                   |
| Chronic heart disease                              | 86 (41)                                                                   | 98 (38)                                                    | 125 (16)                                                    | 0.113          | -                                                                   |
| Dementia                                           | 132 (63)                                                                  | 41 (16)                                                    | 8 (1)                                                       | <0.001         | 0.01 (0.01-0.03)                                                    |
| <b>Clinical presentation of suspect COVID-19</b>   |                                                                           |                                                            |                                                             |                |                                                                     |
| Symptom duration, days                             | 4 (2-7)                                                                   | 5 (3-8)                                                    | 7 (5-10)                                                    | <0.001         | 0.135                                                               |
| Cough                                              | 53 (25)                                                                   | 95 (37)                                                    | 439 (56)                                                    | <0.001         | 2.48 (1.68-3.66)                                                    |
| Dyspnea                                            | 147 (70)                                                                  | 139 (54)                                                   | 368 (47)                                                    | 0.020          | 0.64 (0.44-0.93)                                                    |
| Fever                                              | 143 (68)                                                                  | 198 (77)                                                   | 690 (88)                                                    | 0.031          | 1.65 (1.05-2.60)                                                    |
| Other symptoms                                     | 42 (20)                                                                   | 62 (24)                                                    | 110 (14)                                                    | 0.010          | 0.55 (0.34-0.87)                                                    |
| O <sub>2</sub> saturation in room air on triage, % | 90 (86-94)                                                                | 92 (88-95)                                                 | 94 (89-96)                                                  | 0.392          | -                                                                   |
| Temperature on admission, °C                       | 36.0 (36.0-36.8)                                                          | 36.5 (36.0-37.4)                                           | 37.0 (36.0-37.8)                                            | <0.001         | 0.155                                                               |
| O <sub>2</sub> flows administered on admission, %  | 36 (21-75)                                                                | 36 (21-73)                                                 | 30 (21-50)                                                  | 0.664          | -                                                                   |
| CT visual score, %                                 | 30 (15-50)                                                                | 30 (15-50)                                                 | 30 (20-50)                                                  | 0.009          | 0.101                                                               |
| Consolidations on chest CT                         | 151 (72)                                                                  | 170 (66)                                                   | 533 (68)                                                    | 0.306          | -                                                                   |
| RT-PCR positive on admission                       | 128 (61)                                                                  | 172 (67)                                                   | 252 (67)                                                    | 0.853          | -                                                                   |

<sup>a</sup>p adjusted for age, sex and period of admission with linear or binary logistic regression, as appropriate.

Data are shown as median and interquartile range or numbers and percentages. Crude comparisons were made with Mann-Whitney or chi-square tests, as appropriate. Data on functional autonomy were available for 1251 of the 1264 patients included in the study.

## SUPPLEMENTARY TABLE 8

Comparison of the blood analysis on admission, after categorization of participants according to functional autonomy.

|                                           | Patients with no<br>autonomy/complete<br>dependency in daily<br>activities<br>(n=210) | Patients with<br>partial autonomy<br>in daily activities<br>(n=257) | Patients with<br>complete<br>autonomy in daily<br>activities (n=784) | P <sup>a</sup>   | β standardized or<br>Odds Ratio (95%<br>Confidence Interval)<br>for autonomy |
|-------------------------------------------|---------------------------------------------------------------------------------------|---------------------------------------------------------------------|----------------------------------------------------------------------|------------------|------------------------------------------------------------------------------|
| pH                                        | 7.43 (7.39-7.47)                                                                      | 7.44 (7.41-7.47)                                                    | 7.45 (7.43-7.48)                                                     | <b>0.001</b>     | 0.122                                                                        |
| Bicarbonate, mmol/L                       | 24 (22-28)                                                                            | 24 (22-27)                                                          | 25 (23-27)                                                           | 0.281            | -                                                                            |
| pCO <sub>2</sub> , mmHg                   | 37 (33-42)                                                                            | 36 (32-29)                                                          | 36 (33-39)                                                           | 0.133            | -                                                                            |
| pO <sub>2</sub> , mmHg                    | 78 (64-104)                                                                           | 74 (62-94)                                                          | 74 (62-91)                                                           | 0.081            | -                                                                            |
| PaO <sub>2</sub> /FiO <sub>2</sub> , mmHg | 238 (132-352)                                                                         | 237 (130-314)                                                       | 258 (158-352)                                                        | 0.181            | -                                                                            |
| Haemoglobin, g/dl                         | 12.8 (11.0-14.2)                                                                      | 13.1 (11.7-14.3)                                                    | 13.6 (12.4-14.7)                                                     | 0.527            | -                                                                            |
| White Blood Cell, 1x10 <sup>9</sup> /L    | 7.53 (5.55-10.44)                                                                     | 6.62 (4.97-9.54)                                                    | 6.57 (4.93-8.99)                                                     | <b>0.024</b>     | -0.080                                                                       |
| Lymphocytes, 1x10 <sup>9</sup> /L         | 0.90 (0.56-1.26)                                                                      | 0.82 (0.57-1.19)                                                    | 0.93 (0.66-1.28)                                                     | 0.522            | -                                                                            |
| Platelets, 1x10 <sup>9</sup> /L           | 221 (164-280)                                                                         | 197 (152-261)                                                       | 210 (169-269)                                                        | 0.576            | -                                                                            |
| Creatinine, mg/dl                         | 1.0 (0.8-1.6)                                                                         | 1.0 (0.8-1.3)                                                       | 0.9 (0.7-1.1)                                                        | <b>&lt;0.001</b> | -0.150                                                                       |
| Sodium, mEq/L                             | 139 (136-145)                                                                         | 138 (135-140)                                                       | 137 (135-139)                                                        | <b>&lt;0.001</b> | -0.247                                                                       |
| Potassium, mEq/L                          | 4.0 (3.6-4.5)                                                                         | 4.1 (3.7-4.5)                                                       | 4.0 (3.7-7.3)                                                        | <b>0.028</b>     | -0.078                                                                       |
| Total bilirubin, mg/dl                    | 0.6 (0.5-0.9)                                                                         | 0.7 (0.5-0.9)                                                       | 0.7 (0.5-0.9)                                                        | 0.733            | -                                                                            |
| Aspartate aminotransferase, IU/L          | 40 (26-67)                                                                            | 44 (29-72)                                                          | 44 (32-67)                                                           | 0.635            | -                                                                            |
| Creatine phosphokinase, IU/L              | 122 (51-356)                                                                          | 145 (72-340)                                                        | 129 (72-261)                                                         | <b>&lt;0.001</b> | -0.129                                                                       |
| Lactate dehydrogenase, IU/L               | 314 (241-448)                                                                         | 336 (263-463)                                                       | 346 (270-466)                                                        | 0.980            | -                                                                            |
| D-dimer, ng/dl                            | 1321 (826-2325)                                                                       | 1276 (784-3478)                                                     | 860 (583-1449)                                                       | 0.375            | -                                                                            |
| Fibrinogen, ng/dl                         | 552 (450-666)                                                                         | 580 (460-708)                                                       | 629 (502-754)                                                        | <b>&lt;0.001</b> | 0.149                                                                        |
| INR ratio                                 | 1.21 (1.12-1.44)                                                                      | 1.22 (1.11-1.38)                                                    | 1.21 (1.14-1.31)                                                     | <b>0.005</b>     | -0.112                                                                       |
| aPTT ratio                                | 0.98 (0.88-1.10)                                                                      | 0.98 (0.89-1.07)                                                    | 0.97 (0.90-1.04)                                                     | 0.672            | -                                                                            |
| C-reactive protein, mg/L                  | 89 (42-150)                                                                           | 105 (49-171)                                                        | 98 (49-159)                                                          | <b>0.027</b>     | 0.077                                                                        |

<sup>a</sup>P adjusted for age and sex or bage, sex and period of admission with linear regression, as appropriate.

Data are shown as median and interquartile range. Crude comparisons were made with Mann-Whitney test, as appropriate.

Data on functional autonomy were available for 1251 of the 1264 patients included in the study.



## SUPPLEMENTARY TABLE 9

Comparison of the clinical course, treatments administered and outcomes, after categorization of participants according to functional autonomy.

|                                          | Patients with no autonomy/complete dependency in daily activities (n=210) | Patients with partial autonomy in daily activities (n=257) | Patients with complete autonomy in daily activities (n=784) | P <sup>a</sup>   | β standardized or Odds Ratio (95% Confidence Interval) for autonomy |
|------------------------------------------|---------------------------------------------------------------------------|------------------------------------------------------------|-------------------------------------------------------------|------------------|---------------------------------------------------------------------|
| <b><i>Clinical course</i></b>            |                                                                           |                                                            |                                                             |                  |                                                                     |
| Worst O2 saturation during stay, %       | 91 (85-94)                                                                | 91 (86-93)                                                 | 92 (88-94)                                                  | 0.291            | -                                                                   |
| Maximum O2 flows during stay, %          | 44 (30-75)                                                                | 44 (32-75)                                                 | 40 (28-75)                                                  | 0.052            | -                                                                   |
| Worst arterial O2 pressure, mmHg         | 64 (55-76)                                                                | 58 (48-69)                                                 | 60 (49-69)                                                  | <b>0.005</b>     | -0.118                                                              |
| Temperature peak during stay, °C         | 37.2 (36.0-38.0)                                                          | 37.6 (36.8-38.3)                                           | 38.0 (37.2-38.8)                                            | <b>&lt;0.001</b> | 0.132                                                               |
| Non-invasive ventilation during stay     | 0 (0)                                                                     | 13 (5)                                                     | 110 (14)                                                    | <b>&lt;0.001</b> | 13.50 (4.34-41.92)                                                  |
| <b><i>Therapies against COVID-19</i></b> |                                                                           |                                                            |                                                             |                  |                                                                     |
| Antiviral drugs                          | 53 (25)                                                                   | 113 (44)                                                   | 439 (56)                                                    | <b>&lt;0.001</b> | 3.16 (2.15-4.65)                                                    |
| Antibiotics                              | 193 (92)                                                                  | 242 (94)                                                   | 737 (94)                                                    | 0.879            | -                                                                   |
| Azithromycin                             | 134 (64)                                                                  | 200 (78)                                                   | 619 (79)                                                    | <b>0.030</b>     | 1.59 (1.05-2.43)                                                    |
| Hydroxychloroquine                       | 107 (51)                                                                  | 167 (65)                                                   | 510 (65)                                                    | <b>&lt;0.001</b> | 2.85 (1.91-4.24)                                                    |
| Steroids                                 | 42 (20)                                                                   | 54 (21)                                                    | 141 (18)                                                    | 0.100            | -                                                                   |
| Enoxaparin                               | 185 (88)                                                                  | 231 (90)                                                   | 713 (91)                                                    | 0.109            | -                                                                   |
| Fondaparinux                             | 19 (9)                                                                    | 20 (8)                                                     | 55 (7)                                                      | .512             | -                                                                   |
| <b><i>Outcome</i></b>                    |                                                                           |                                                            |                                                             |                  |                                                                     |
| Intensive care unit                      | 0 (0)                                                                     | 3 (1)                                                      | 55 (7)                                                      | <b>0.007</b>     | 41.6 (2.8-615)                                                      |
| Death                                    | 90 (43)                                                                   | 87 (34)                                                    | 133 (17)                                                    | <b>0.040</b>     | 0.64 (0.42-0.98)                                                    |

<sup>a</sup>P adjusted for age, sex and period of admission with linear or binary logistic regression, as appropriate.

Data are shown as median and interquartile range or numbers and percentages. Crude comparisons were made with Mann-Whitney or chi-square tests, as appropriate. Data on functional autonomy were available for 1251 of the 1264 patients included in the study.

## SUPPLEMENTARY FIGURE 1

Age distribution of patients admitted during the first (Feb 28-Mar 23, 2020) and the second phase (Mar 24-Jun 10, 2020) of the first pandemic wave in our institution.

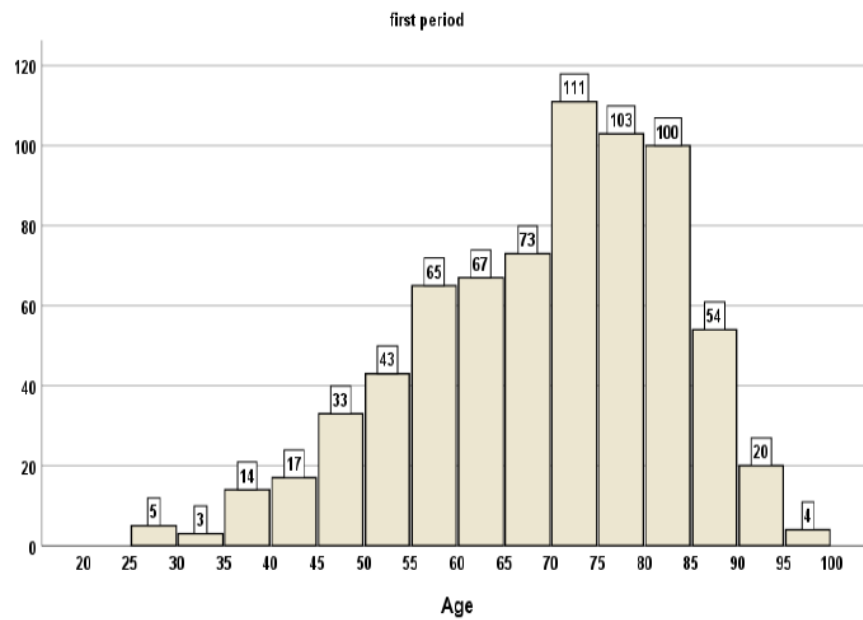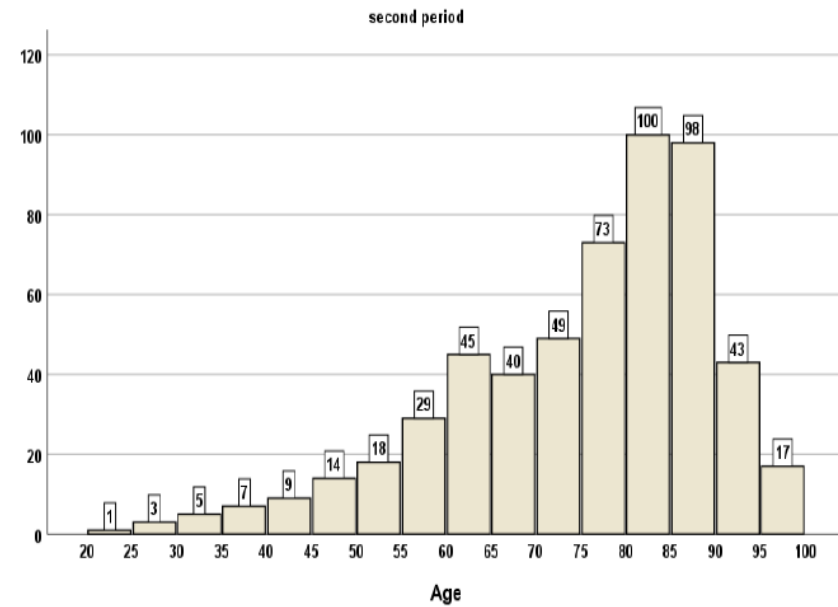

Supplement: s1 [file s1]
